# Supplementary material
Source: Springer Nature journal article supplement (https://www.springermedizin.de/resource/supplementary/12931_2011_1124_MOESM2_ESM.pdf/9425702)

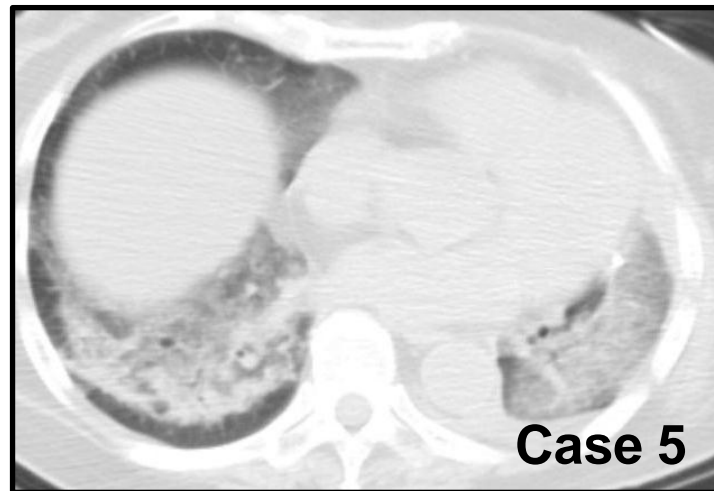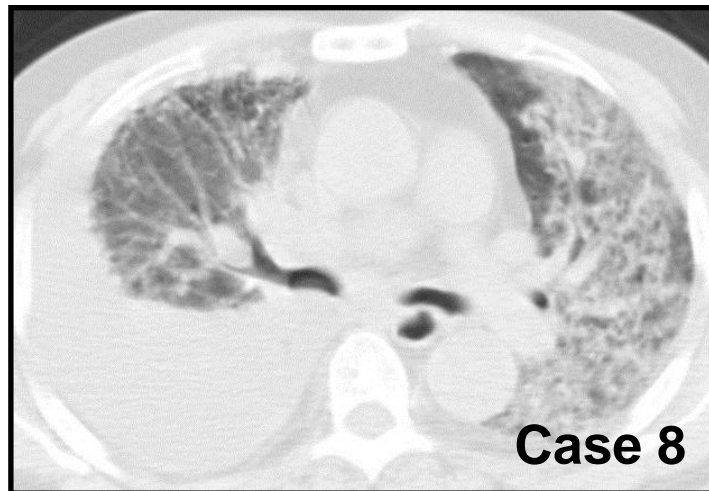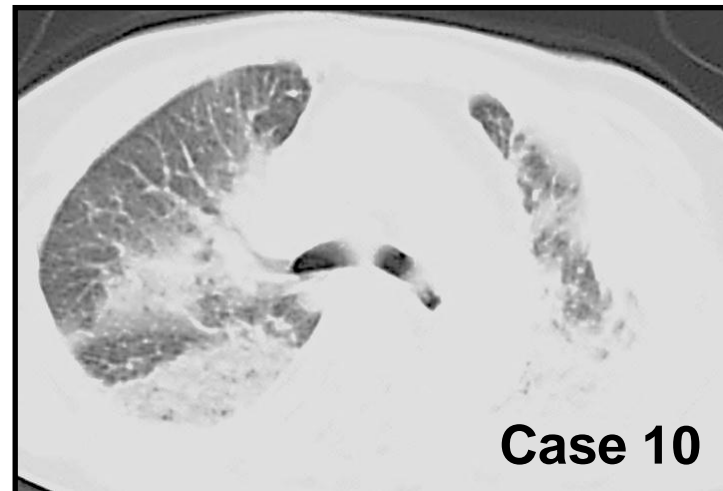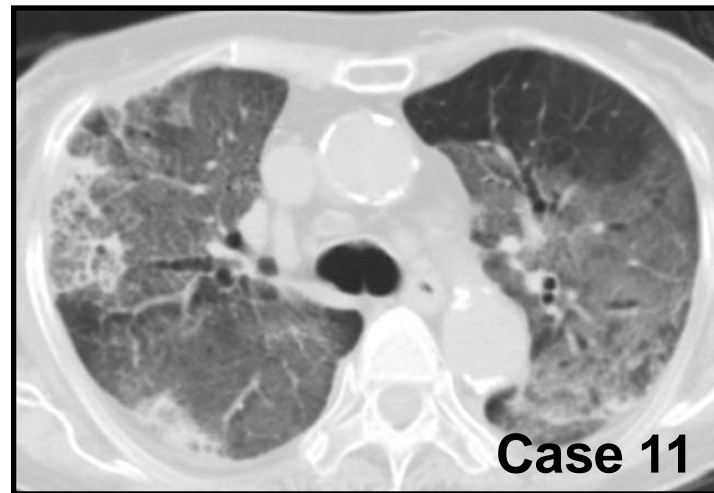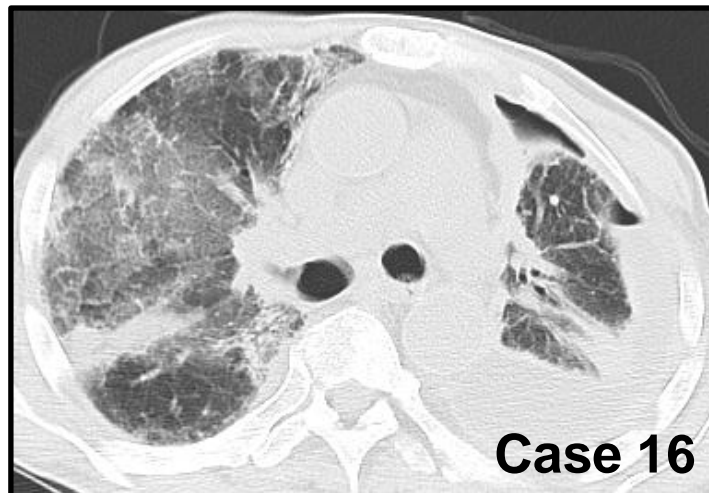

Supplement: MOESM2 [file 9425702]
